# Supplementary material for: Medical and Nonmedical Information during Multidisciplinary Team Meetings in Cancer Care
Source: MDPI journal article supplement (doi:10.3390/curroncol28010098), 2021-02-23
Supplement: s1 [file s1]

**Supplementary table 1.** Data to support figure 1; correlations and odds ratios for information in relation to patient characteristics and MDT team.

|                                                    | Odds Ratio (95% CI) |
|----------------------------------------------------|---------------------|
| <b>Physical information</b>                        |                     |
| Age: Q3 vs Q1 (ref)                                | 1.19 (0.91-1.58)    |
| Sex: Female vs Male (ref)                          | 0.81 (0.5-1.3)      |
| Team: Neuro-oncology vs Hepatobiliary cancer (ref) | 6.33 (3.46-11.6)    |
| Sarcoma vs Hepatobiliary cancer (ref)              | 1.09 (0.61-1.95)    |
| <b>Comorbidity</b>                                 |                     |
| Age: Q3 vs Q1 (ref)                                | 1.2 (0.89-1.61)     |
| Sex: Female vs Male (ref)                          | 0.89 (0.55-1.45)    |
| Team: Neuro-oncology vs Hepatobiliary cancer (ref) | 0.43 (0.25-0.76)    |
| Sarcoma vs Hepatobiliary cancer (ref)              | 0.12 (0.07-0.23)    |
| <b>Psychological information</b>                   |                     |
| Age: Q3 vs Q1 (ref)                                | 0.87 (0.54-1.41)    |
| Sex: Female vs Male (ref)                          | 1.39 (0.65-2.97)    |
| Team: Neuro-oncology vs Hepatobiliary cancer (ref) | 0.88 (0.37-2.06)    |
| Sarcoma vs Hepatobiliary cancer (ref)              | 0.34 (0.11-1.08)    |
| <b>Non-medical information</b>                     |                     |
| Age: Q3 vs Q1 (ref)                                | 0.9 (0.68-1.19)     |
| Sex: Female vs Male (ref)                          | 0.68 (0.42-1.12)    |
| Team: Neuro-oncology vs Hepatobiliary cancer (ref) | 1.89 (1.04-3.42)    |
| Sarcoma vs Hepatobiliary cancer (ref)              | 1 (0.52-1.93)       |
